# Supplementary material for: In situ growth of a heterojunction cocatalyst on the g-C3N5 surface enhances charge transfer to improve photocatalytic activity
Source: Royal Society of Chemistry journal article supplement (doi:10.1039/d4en00136b), 2024-01-01
Supplement: d4en00136b1.pdf [file d4en00136b1.pdf]

## Supplementary Information

### In situ growth of heterojunction cocatalyst on g-C<sub>3</sub>N<sub>5</sub> surface enhances charge transfer to improve photocatalytic activity

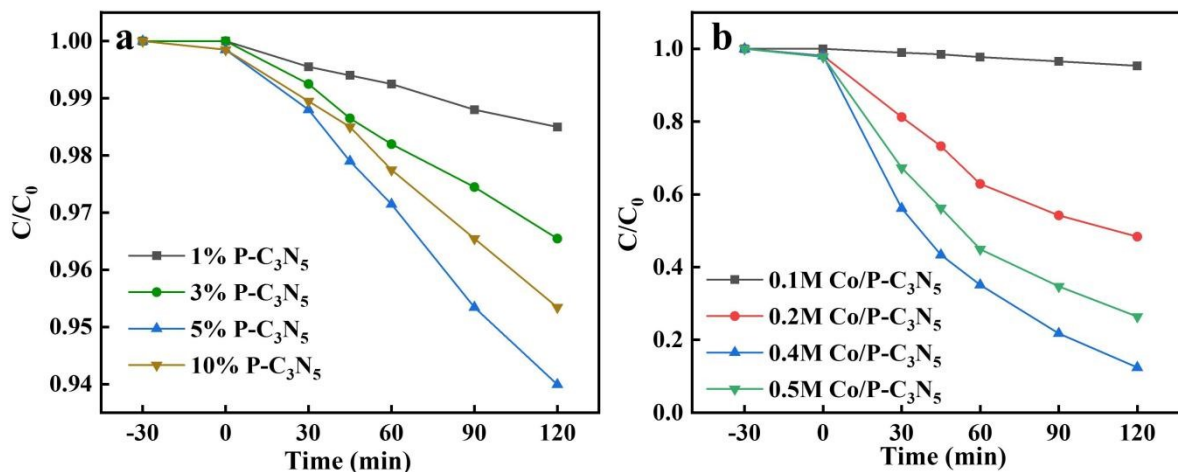

Figure.S1. (a)Photocatalytic degradation of TC under visible light (30 min in the dark) by different P contents of P-C<sub>3</sub>N<sub>5</sub>, and (b) by different Co contents of CoOOH·CoO<sub>x</sub>/P-C<sub>3</sub>N<sub>5</sub>

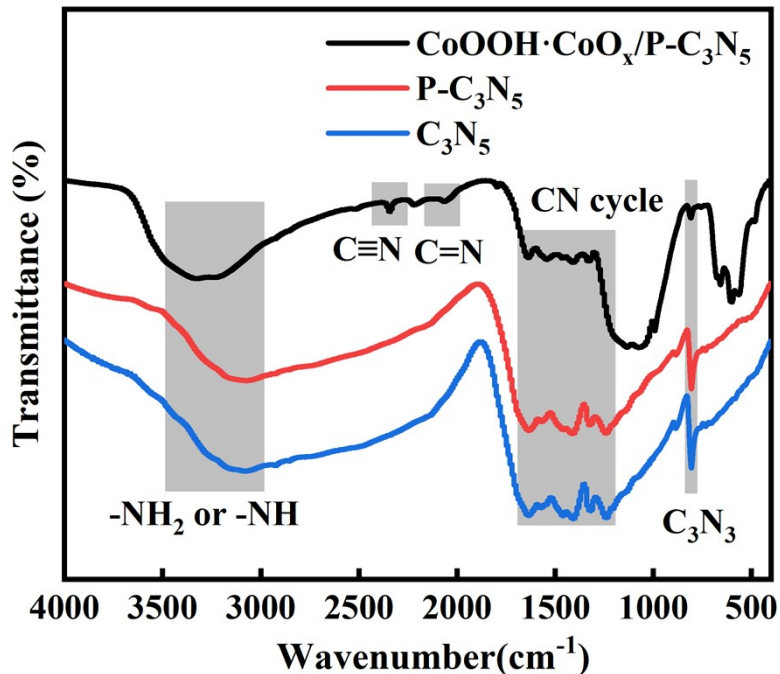

Figure.S2. FTIR of C<sub>3</sub>N<sub>5</sub>, P-C<sub>3</sub>N<sub>5</sub> and CoOOH·CoO<sub>x</sub>/P-C<sub>3</sub>N<sub>5</sub>

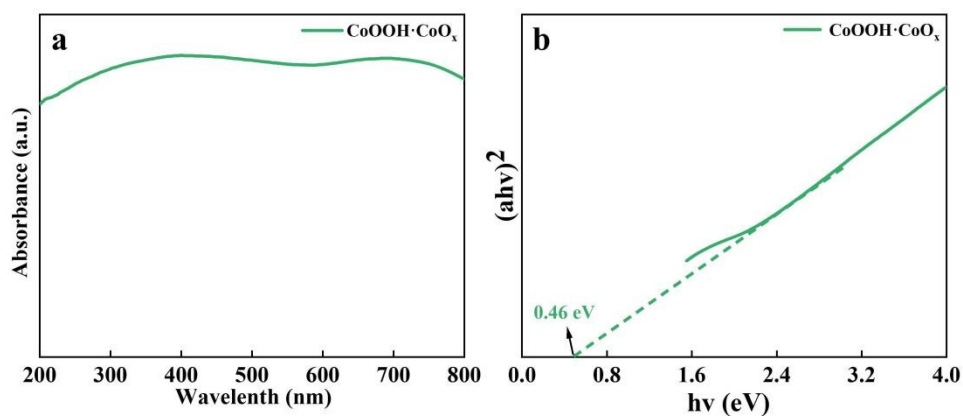

Figure. S3.(a) UV-vis absorption spectra and (b)  $(ah\nu)^2$  versus  $h\nu$  curves of the  $\text{CoOOH}\cdot\text{CoO}_x$ .

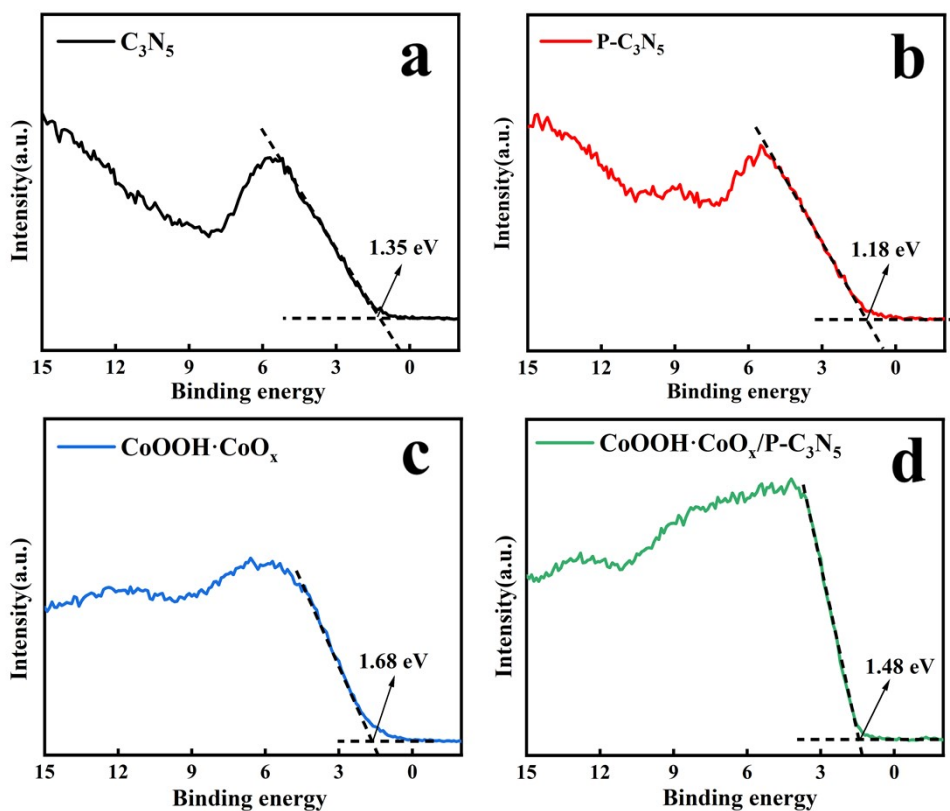

Figure. S4. XPS Vb of (a)  $\text{C}_3\text{N}_5$ , (b)  $\text{P-C}_3\text{N}_5$ , (c)  $\text{CoOOH}\cdot\text{CoO}_x$  and (d)  $\text{CoOOH}\cdot\text{CoO}_x/\text{P-C}_3\text{N}_5$

As shown in Figure S3 and Figure S4, the  $\text{CoOOH}\cdot\text{CoO}_x$  in these figures is not in-situ growth on the surface of  $\text{P-C}_3\text{N}_5$ , which may be different from the  $\text{CoOOH}\cdot\text{CoO}_x$  in the proposed material, but it is still of certain reference value.

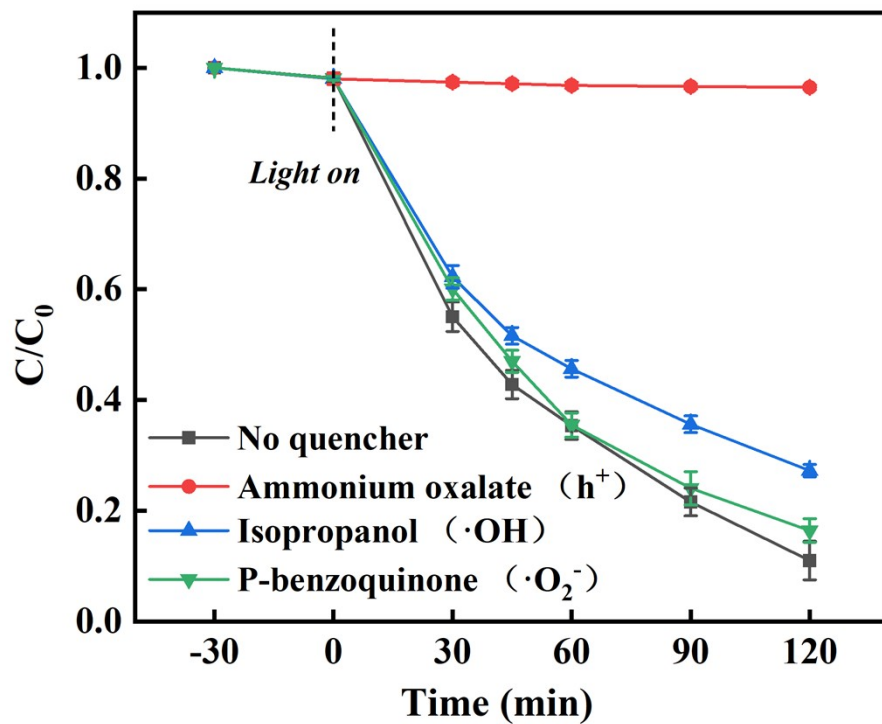

Figure.S5. Masking experiment of TC degradation by  $\text{CoOOH}\cdot\text{CoO}_x/\text{P-C}_3\text{N}_5$

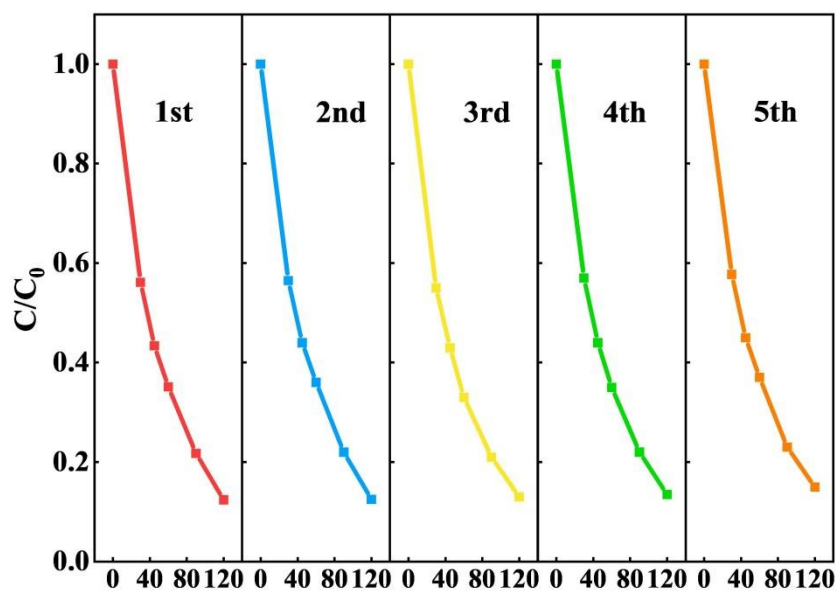

Figure.S6. Cyclic experiment of TC degradation by  $\text{CoOOH}\cdot\text{CoO}_x/\text{P-C}_3\text{N}_5$

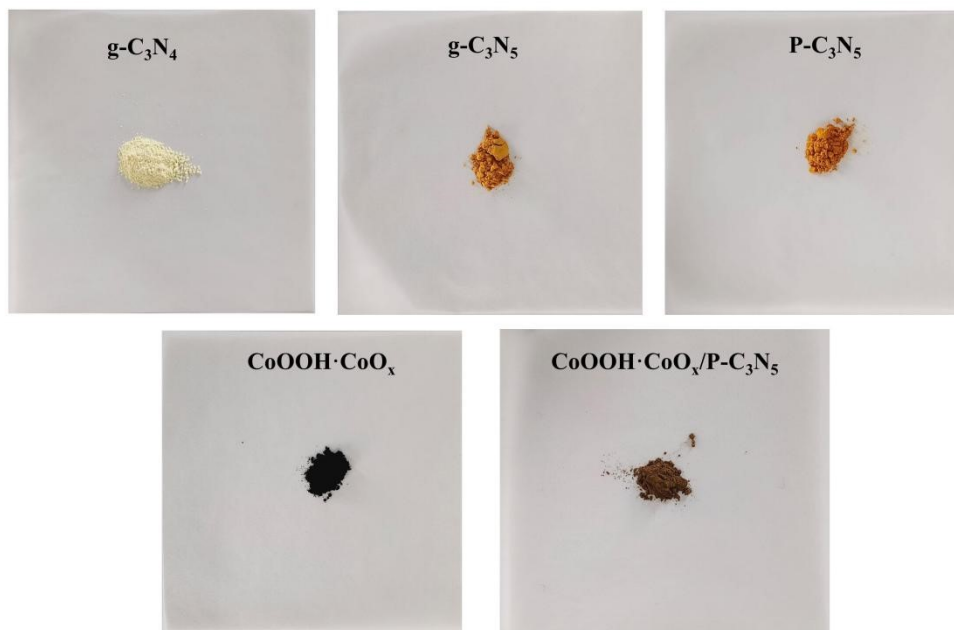

Figure.S7. Photos of  $g-C_3N_4$ ,  $g-C_3N_5$ ,  $P-C_3N_5$ ,  $CoOOH \cdot CoO_x$  and  $CoOOH \cdot CoO_x/P-C_3N_5$

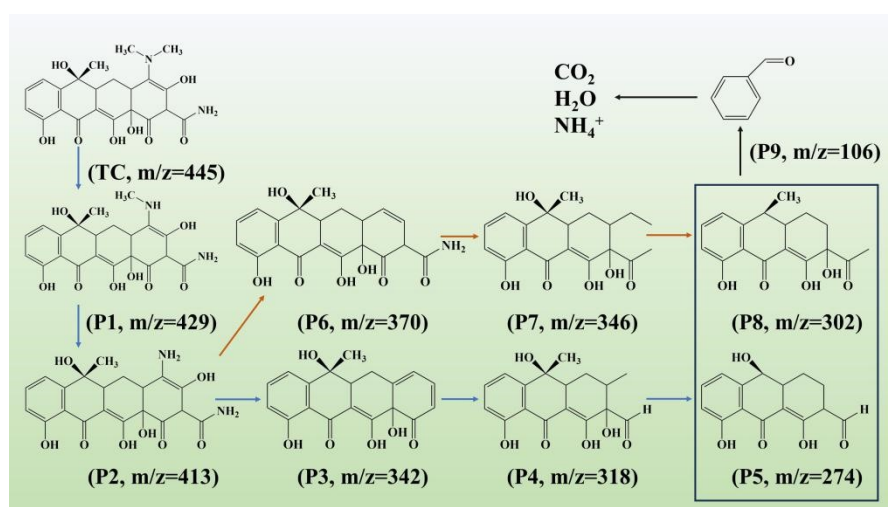

Figure.S8. The proposed photocatalytic-degradation pathways of TC

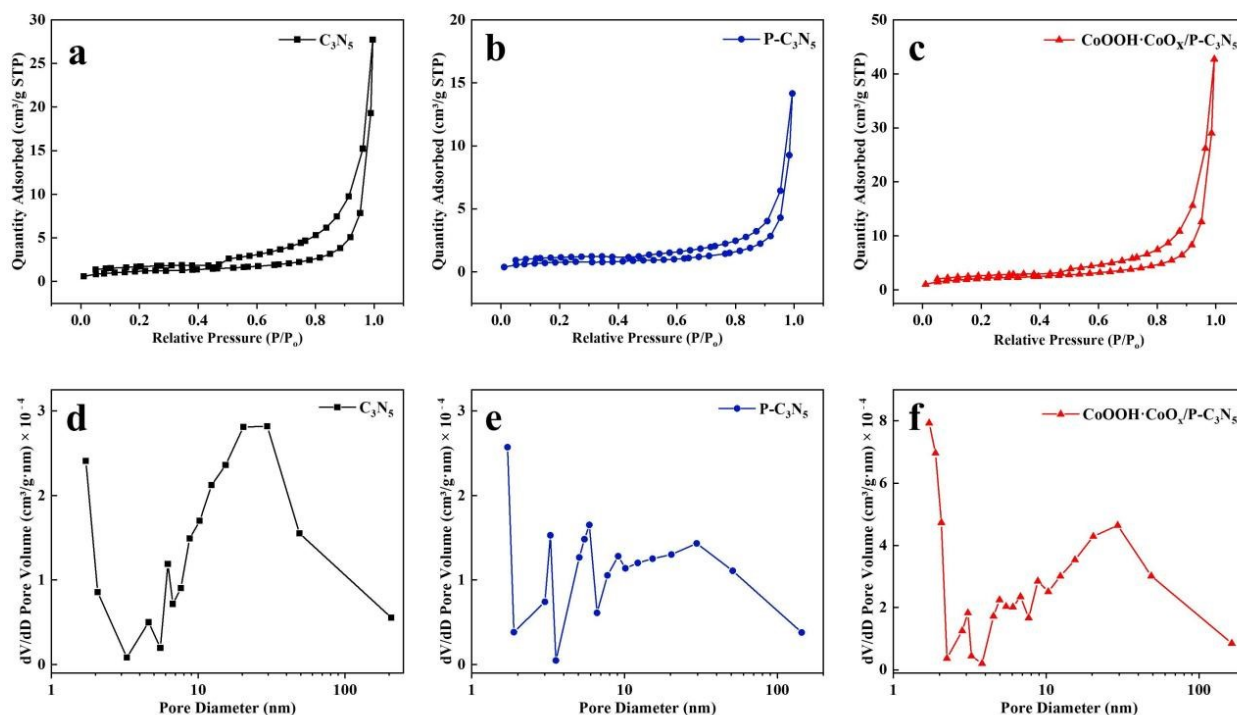

Figure.S9. N<sub>2</sub> adsorption–desorption isotherms of C<sub>3</sub>N<sub>5</sub> (a), P-C<sub>3</sub>N<sub>5</sub> (b) and CoOOH·CoO<sub>x</sub>/P-C<sub>3</sub>N<sub>5</sub> (c), the pore-size distribution curves for C<sub>3</sub>N<sub>5</sub> (d), P-C<sub>3</sub>N<sub>5</sub> (e) and CoOOH·CoO<sub>x</sub>/P-C<sub>3</sub>N<sub>5</sub> (f).

As shown in Fig. S9, nitrogen adsorption–desorption is used to investigate the pore structure and surface areas of C<sub>3</sub>N<sub>5</sub>, P-C<sub>3</sub>N<sub>5</sub> and CoOOH·CoO<sub>x</sub>/P-C<sub>3</sub>N<sub>5</sub>. All the samples display type IV curves, indicating the presence of mesopores [1]. The shape of the hysteresis loops for the three samples is categorized as type H3, which implies the formation of slit-like pores owing to the aggregation of the sheet-like particles [1]. The CoOOH·CoO<sub>x</sub>/P-C<sub>3</sub>N<sub>5</sub> sample contains small mesopores (3–4 nm) and large mesopores (20–50 nm). As shown in Table S1, the BET surface areas ( $S_{\text{BET}}$ ) and pore volume of CoOOH·CoO<sub>x</sub>/P-C<sub>3</sub>N<sub>5</sub> are the highest, which is consistent with the results of SEM. This mesoporous hierarchical architecture could provide a transport path for the reactants and products and offers more active sites and enhance photo-energy harvesting in photocatalysis [1–4].

Table S1. Summary of the  $S_{\text{BET}}$ , pore volume, and peak pore size.

| Samples                                                 | $S_{\text{BET}}$ (m <sup>2</sup> /g) | Pore volume (cm <sup>3</sup> /g) | Peak pore size (nm) |
|---------------------------------------------------------|--------------------------------------|----------------------------------|---------------------|
| C <sub>3</sub> N <sub>5</sub>                           | 4.3                                  | 0.043                            | 6.4/23.5            |
| P-C <sub>3</sub> N <sub>5</sub>                         | 2.8                                  | 0.022                            | 5.9/27.3            |
| CoOOH·CoO <sub>x</sub> /P-C <sub>3</sub> N <sub>5</sub> | 7.6                                  | 0.066                            | 8.6/29.6            |

## Reference

- [1] J. Zhang, J. Yu, Y. Zhang, Q. Li, J.R. Gong, Visible Light Photocatalytic H<sub>2</sub>-Production Activity of CuS/ZnS Porous Nanosheets Based on Photoinduced Interfacial Charge Transfer, *Nano Lett.* 11 (2011) 4774–4779. <https://doi.org/10.1021/nl202587b>.
- [2] G. Li, D. Zhang, J.C. Yu, M.K.H. Leung, An Efficient Bismuth Tungstate Visible-Light-Driven Photocatalyst for Breaking Down Nitric Oxide, *Environ. Sci. Technol.* 44 (2010) 4276–4281. <https://doi.org/10.1021/es100084a>.
- [3] X. Yu, J. Yu, B. Cheng, M. Jaroniec, Synthesis of Hierarchical Flower-like AlOOH and TiO<sub>2</sub>/AlOOH Superstructures and their Enhanced Photocatalytic Properties, *J. Phys. Chem. C* 113 (2009) 17527–17535. <https://doi.org/10.1021/jp906992r>.
- [4] W. Shao, F. Gu, L. Gai, C. Li, Planar scattering from hierarchical anatase TiO<sub>2</sub> nanoplates with variable shells to improve light harvesting in dye-sensitized solar cells, *Chem. Commun.* 47 (2011) 5046. <https://doi.org/10.1039/c1cc10548e>.
